# Supplementary material
Source: publisher figshare collection journal article supplement (https://gsajournals.figshare.com/articles/dataset/_/12950441)
Supplement: Supplementary file 1 [file 1]

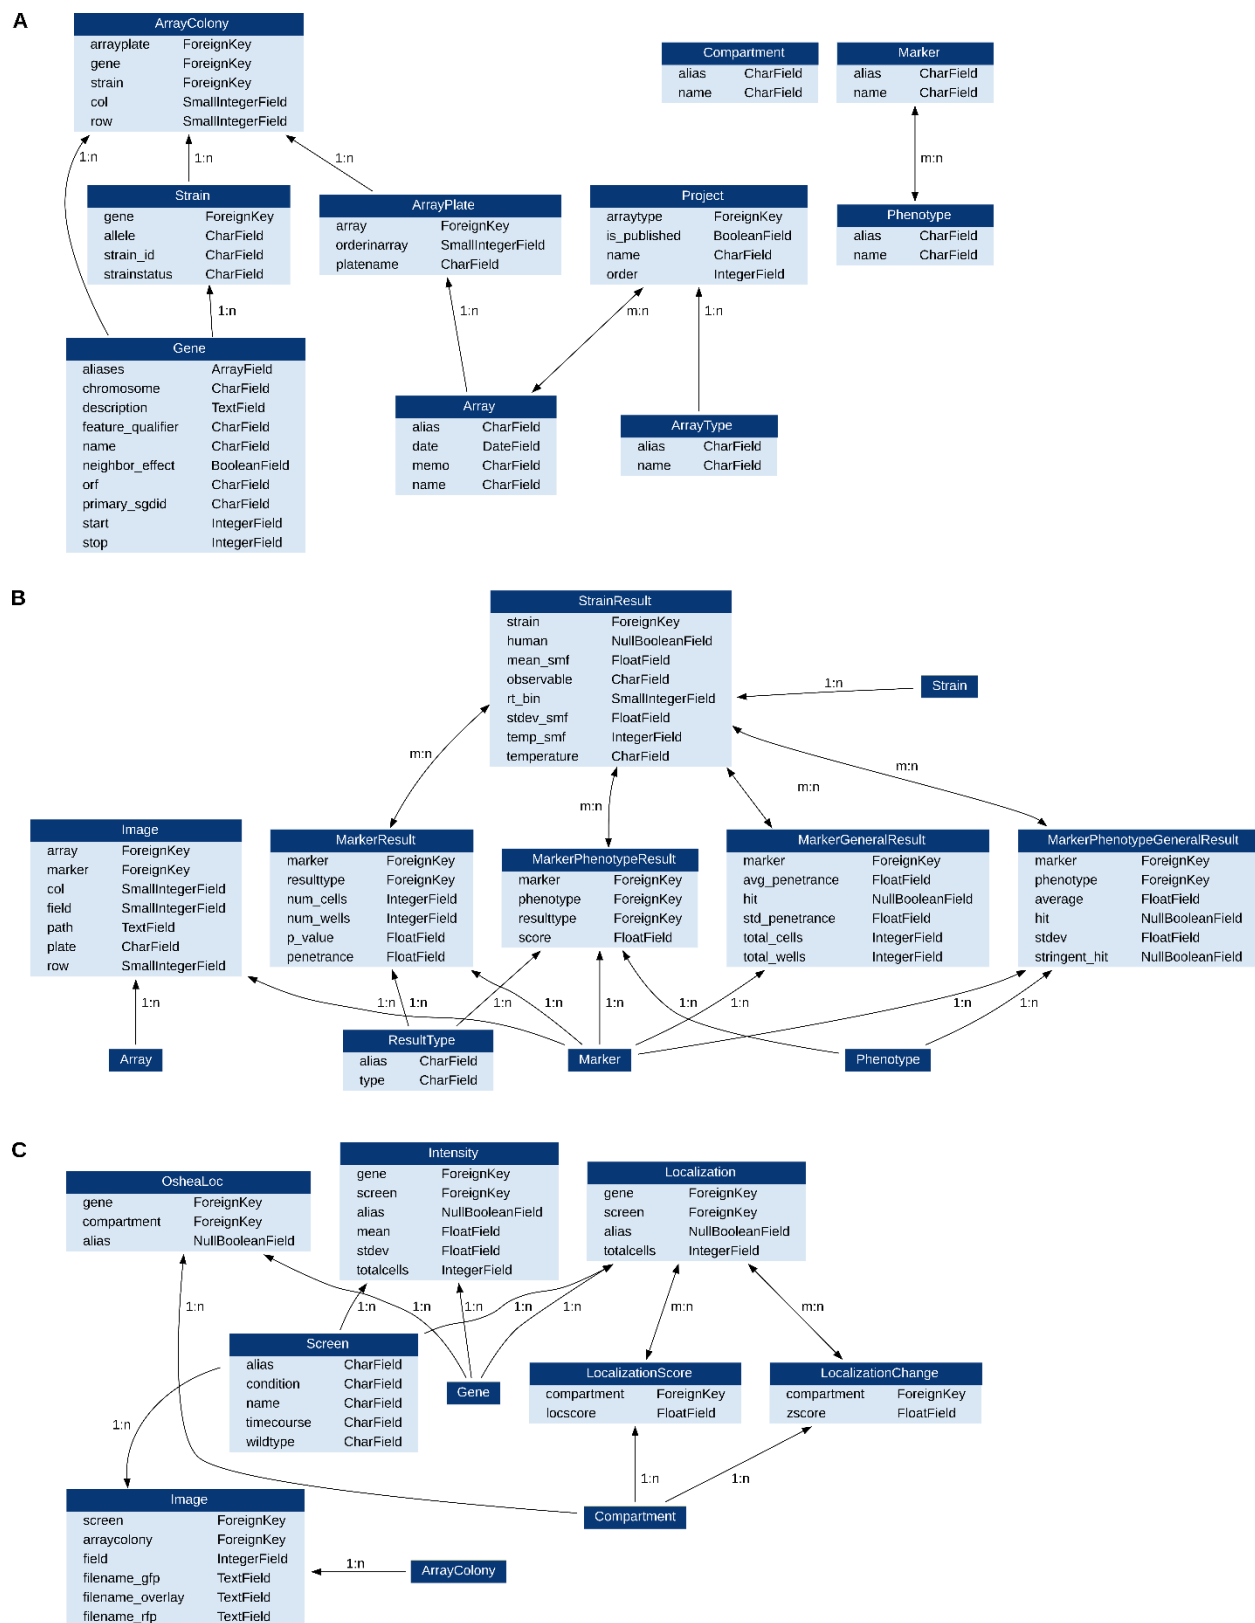

**Figure S1** Diagrams illustrating the database schema for each of the clusters: A) core, B) Endocytic Compartment Morphology project, C) CYCLOPs project
